# Supplementary material for: Cytochromes P450 Associated with the Biosyntheses of Ribosomally Synthesized and Post-translationally Modified Peptides
Source: PubMed Central journal article supplement — ACS Bio Med Chem Au. 2023 Jul 13;3(5):371–88. doi: 10.1021/acsbiomedchemau.3c00026 (PMC10591300; doi:10.1021/acsbiomedchemau.3c00026), 2023-07-13
Supplement: bg3c00026_si_001.pdf [file bg3c00026_si_001.pdf]

**Cytochromes P450 associated with the biosyntheses of ribosomally-synthesized and post-translationally modified peptides**

Guannan Zhong<sup>1,2\*</sup>

1, State Key Laboratory of Microbial Technology, Shandong University, Qingdao 266237, China.

2, Suzhou Research Institute of Shandong University, Suzhou 215123, China.

\* To whom correspondence should be addressed. Email: zhonggn@sdu.edu.cn

|                                                            |                                                                                 |    |
|------------------------------------------------------------|---------------------------------------------------------------------------------|----|
| Streptomyces sp. CLI2509 (TrpA)                            | .....MRLLFSLKKNKMSQ.....QKSLKAHAWYIWI..                                         | 26 |
| Streptomyces laurentii ATCC 31255                          | .....VFDVSALEGGAVMKLLFAIRNKVSA.....QKSLKASAWYIWI..                              | 38 |
| Streptomyces rimosus ATCC 10970.txt                        | .....VAEQCFVSRSAGVGRFVSFACPGGAVMKLLINSLKMKKA.....EKSLKAYAWYIWI..                | 54 |
| Streptomyces sp. SAT1                                      | .....VPAPNRKE...SAMKLLFAVRNKVSA.....RKSLKASAWYIWI..                             | 36 |
| Streptomyces sp. YIM 121038                                | .....MAKIIKALKAAT.....KKNEPSLKQSAWYIWI..                                        | 28 |
| Streptomyces spectabilis strain ATCC 27741                 | .....LPRAENAWKEGFY.MAKIIQALKAAT.....KKSEPSLKQSAWYIWI..                          | 41 |
| Streptomyces tsukubensis AT3                               | .....MKLLSSLKKKIAP.....EKSLKAYAWYIWI..                                          | 26 |
| Xanthomonas sacchari R1                                    | .....VQARLADAIAPRALASAKPRSPPERAIVTPAEMSLMKLLFSIKHLLSS.....KKPLKSYAWYIWI..       | 62 |
| Streptomyces sp. 3214.6                                    | .....LLWRYSMKMFALKRKIVG.....EKSLKAYAWYLWI..                                     | 32 |
| Streptomyces roseochromogenus subsp. oscitans DS 12.976    | .....MKLLFAIRNKVAA.....AKSLKANAWYLWI..                                          | 26 |
| Streptomyces olivoreticuli subsp. olivoreticuli ATCC 31159 | .....VAIKFRARNANRRVENE.RGGVWPMSKFLSAVRNAGNPICRDFPFFKSEPSLKQSAWYVWY..            | 61 |
| Streptomyces katrae strain S3 isolate 4                    | .....MKMLFAIRNAVSG.....QKSLKKSAWYFWY..                                          | 26 |
| Streptomyces sp. W1SF4                                     | .....MKMLFAIRNAVSG.....QKSLKKSAWYFWY..                                          | 26 |
| Streptomyces hungungensis BH38                             | .....VSELACPVRQFIPYIRE..RKGLT.MAKIIAALRTRG.....SKSEPSLKQAAWYFWY..               | 50 |
| Streptomyces griseochromogenes ATCC 14511                  | .....VRDISALEGGVVMKLLFALRNKVSA.....QKSLKKSAWYFWY..                              | 38 |
| Streptomyces alboniger strain ATCC 12461                   | .....LIASPDASLVQVRREPTELTGGMYMKMIRSLKKKITG.....EKSLKAYAWYHWY..                  | 50 |
| Streptomyces kanamyceticus ATCC 12853                      | .....MPVIACHLPVYQLLIGYQAPRVQVSHVPMELTGGMCMKIVRSLKKRITG.....EKSLKAYAWYHWY..      | 63 |
| Xanthomonas translucens pv. translucens DSM 18974          | .....MPRMNVLFISKQLSS.....KSLKSYAWLHWY..                                         | 29 |
| Amycolatopsis sp. AA4                                      | .....MKLVRLVRKALPS.....KSLKSYAWYGWI..                                           | 25 |
| Kitasatospora sp. MMS16-BH015                              | ..VNFSWASLFEAVESGSGGNYPSRNHHSQRRRRNHRVTPNGGTAVKLVHFVKKVMPE.....KSLKAYAWYGWI..   | 68 |
| Nocardia terpenica strain NC YFY NT001                     | .....MRPRSGRERGN..TLEPGGVVVALVRIVKRMKQG.....KSLKQYAWYGWI..                      | 44 |
| Streptomyces albulus NK660                                 | .....MEVRMKFVRLVKRMRSD.....KSLKAYAWYGWI..                                       | 29 |
| Streptomyces noursei ATCC 11455                            | .....MGHLTPQPPRHSLLRRSKTLSAACHGAQSAPAKEVRMKFVRLVKRMRTE.....KSLKAYAWYGWI..       | 61 |
| Streptomyces platensis ATCC 23948                          | .....MPGILPGIDIFCHRISIS..FATQMEVLMKLVRLVKFRPE.....KSLKAYAWYGWI..                | 51 |
| Streptomyces sp. 769                                       | .....MSHLTPQPPRHSLLRRSKTLSAACHGAQSAPAKEVRMKFVRLVKRMRTE.....KSLKAYAWYGWI..       | 61 |
| Streptomyces sp. TLI 053                                   | .....MKLVHFVKKVMPE.....KSLKAYAWYGWI..                                           | 25 |
| Streptomyces sp. CB01881                                   | .....MKLVHFVKKVMPE.....KSLKAYAWYGWI..                                           | 25 |
| Xanthomonas cucurbitae ATCC 23378                          | .....VIDCAHRPSGQ..TTPQNRMSLMKMLFSLKNLLAS.....NKSLSYAWYIWI..                     | 46 |
| Xanthomonas vasicola pv. vasculorum Xv1601                 | MVGQPCVAFVLAQPLSLARKYPLIVYLIKSPERAI PPY IRI SLMKILFSIKHMLAS.....RKSLKASAWTEYF.. | 70 |
| Xanthomonas vasicola pv. vasculorum SAM119                 | MVGQPCVAFVLAQPLSLARKYPLIVYLIKSPERAI PPY IRI SLMKILFSIKHMLAS.....RKSLKASAWTEYF.. | 70 |
| Xanthomonas vasicola NCPPB 902                             | MVGQPCVAFVLAQPLSLARKYPLIVYLIKSPERAI PPY IRI SLMKILFSIKHMLAS.....RKSLKSSSWPVYF.. | 70 |
| Xanthomonas vasicola NCPPB 1060                            | MVGQPYVAFVLAQPLSLARKYPLIVYLIKSPERAI PPY IRI SLMKILFSIKHMLAS.....RKSLKSSSWGLYM.. | 70 |
| Xanthomonas albilineans GPE PC73                           | .....VMMPFMKMLMTIKELLSSN.....KSLKSSAWALYISY                                     | 34 |
| Xanthomonas albilineans Xa-FJ1                             | .....VMMPFMKMLMTIKELLSSN.....KSLKSSAWALYISY                                     | 34 |
| Consensus                                                  | .....l k w                                                                      |    |

**Figure S1.** Multiple sequence alignment of the putative atropitide precursor peptides.

**Table S1.** Partial genome neighborhood network (GNN) result of P450s adjacent to RiPP PTM enzymes.

| Shared name                 | name                        | Pfam            | Pfam description                                                                    | # of sequences in SSN cluster | # of sequences in SSN cluster with neighbors | # of queries with Pfam neighbors | # of Pfam neighbors |
|-----------------------------|-----------------------------|-----------------|-------------------------------------------------------------------------------------|-------------------------------|----------------------------------------------|----------------------------------|---------------------|
| PqqD                        | PqqD                        | PF05402         | Coenzyme PQQ synthesis protein D (PqqD)                                             | 3                             | 3                                            | 3                                | 3                   |
| DUF4135                     | DUF4135                     | PF13575         | Domain of unknown function (DUF4135)                                                | 17                            | 16                                           | 9                                | 9                   |
| DUF4135-DUF6624             | DUF4135-DUF6624             | PF13575-PF20329 | Domain of unknown function (DUF4135)-<br>Family of unknown function (DUF6624)       | 2                             | 2                                            | 2                                | 2                   |
| LANC_like                   | LANC_like                   | PF05147         | Lanthionine synthetase C-like protein                                               | 41                            | 35                                           | 11                               | 13                  |
| LANC_like-DUF4135           | LANC_like-DUF4135           | PF05147-PF13575 | Lanthionine synthetase C-like protein-<br>Domain of unknown function (DUF4135)      | 19                            | 18                                           | 7                                | 7                   |
| RamS                        | RamS                        | PF19402         | Lanthionine-containing peptide SapB precursor RamS                                  | 14                            | 14                                           | 3                                | 3                   |
| Lant_dehydr_C               | Lant_dehydr_C               | PF14028         | Lantibiotic biosynthesis dehydratase C-term                                         | 43                            | 43                                           | 23                               | 28                  |
| Lant_dehydr_N               | Lant_dehydr_N               | PF04738         | Lantibiotic dehydratase, N terminus                                                 | 41                            | 41                                           | 17                               | 17                  |
| Lant_dehydr_N-Lant_dehydr_C | Lant_dehydr_N-Lant_dehydr_C | PF04738-PF14028 | Lantibiotic dehydratase, N terminus-<br>Lantibiotic biosynthesis dehydratase C-term | 19                            | 19                                           | 4                                | 4                   |
| DUF692                      | DUF692                      | PF05114         | Protein of unknown function (DUF692)                                                | 35                            | 34                                           | 33                               | 33                  |
| Strep_pep                   | Strep_pep                   | PF14404         | Ribosomally synthesized peptide in <i>Streptomyces</i> species                      | 121                           | 116                                          | 28                               | 28                  |
| Thiopep_pre                 | Thiopep_pre                 | PF19409         | Thiopeptide-type bacteriocin precursor                                              | 5                             | 5                                            | 4                                | 4                   |
| YcaO                        | YcaO                        | PF02624         | YcaO cyclodehydratase, ATP-and Mg <sup>2+</sup> -binding                            | 53                            | 52                                           | 38                               | 38                  |
